# Supplementary material
Source: publisher site journal article supplement (https://www.spandidos-publications.com/2390/downloadSupplementary)

Figure S1. Changes in the numbers of CD31-positive endothelial cells in the hippocampus of SE rats (x400 magnification). (A) Changes in numbers of CD31-positive endothelial cells in the CA3 region of the hippocampus. (B) Changes in numbers of CD31-positive endothelial cells in the DG region of the hippocampus. SE, status epilepticus; d, day.

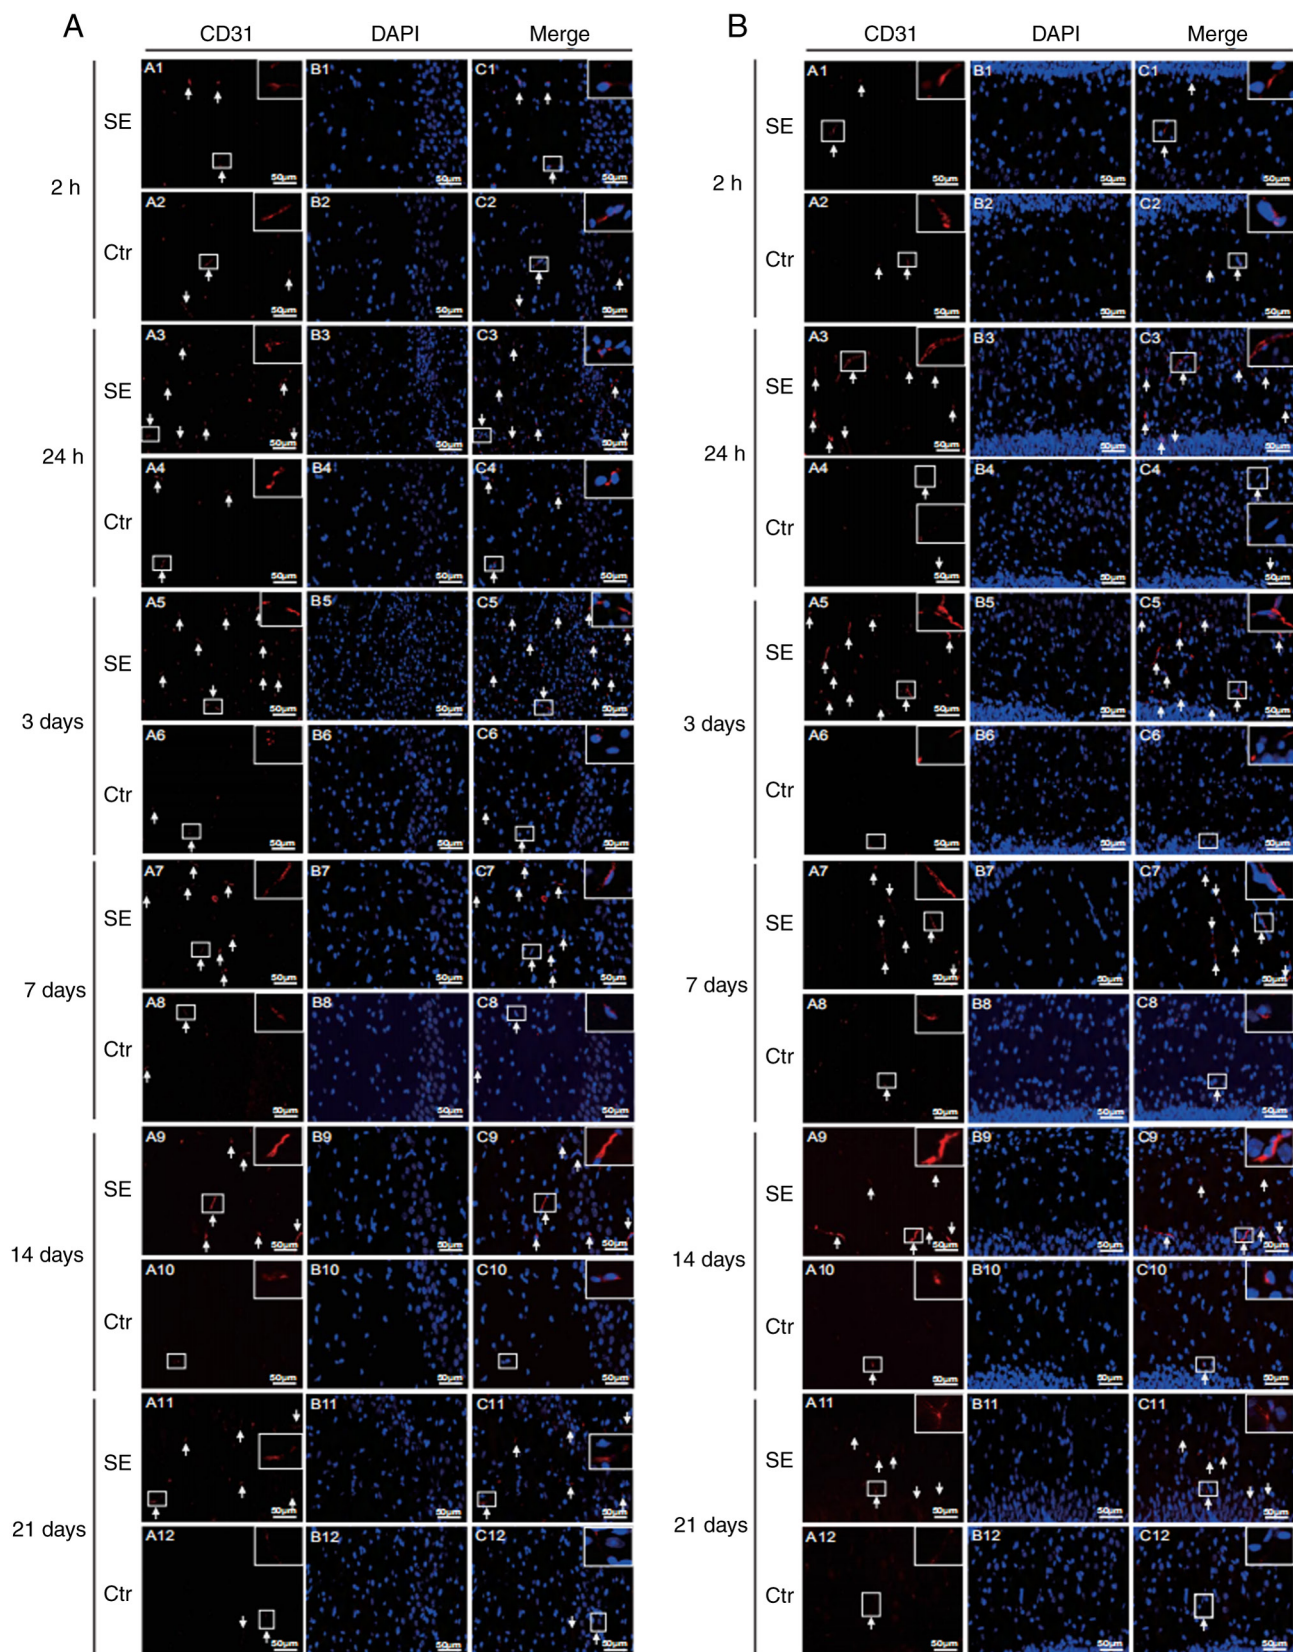

Figure S2. Changes in the expression of EMAP II-positive cells in the hippocampus of SE rats (x400 magnification). (A) Changes in numbers of EMAP II-positive cells in the CA3 region of the hippocampus. (B) Changes in numbers of EMAP II-positive cells in the DG region of the hippocampus. EMAP II, endothelial monocyte-activating polypeptide II; SE, status epilepticus; d, day.

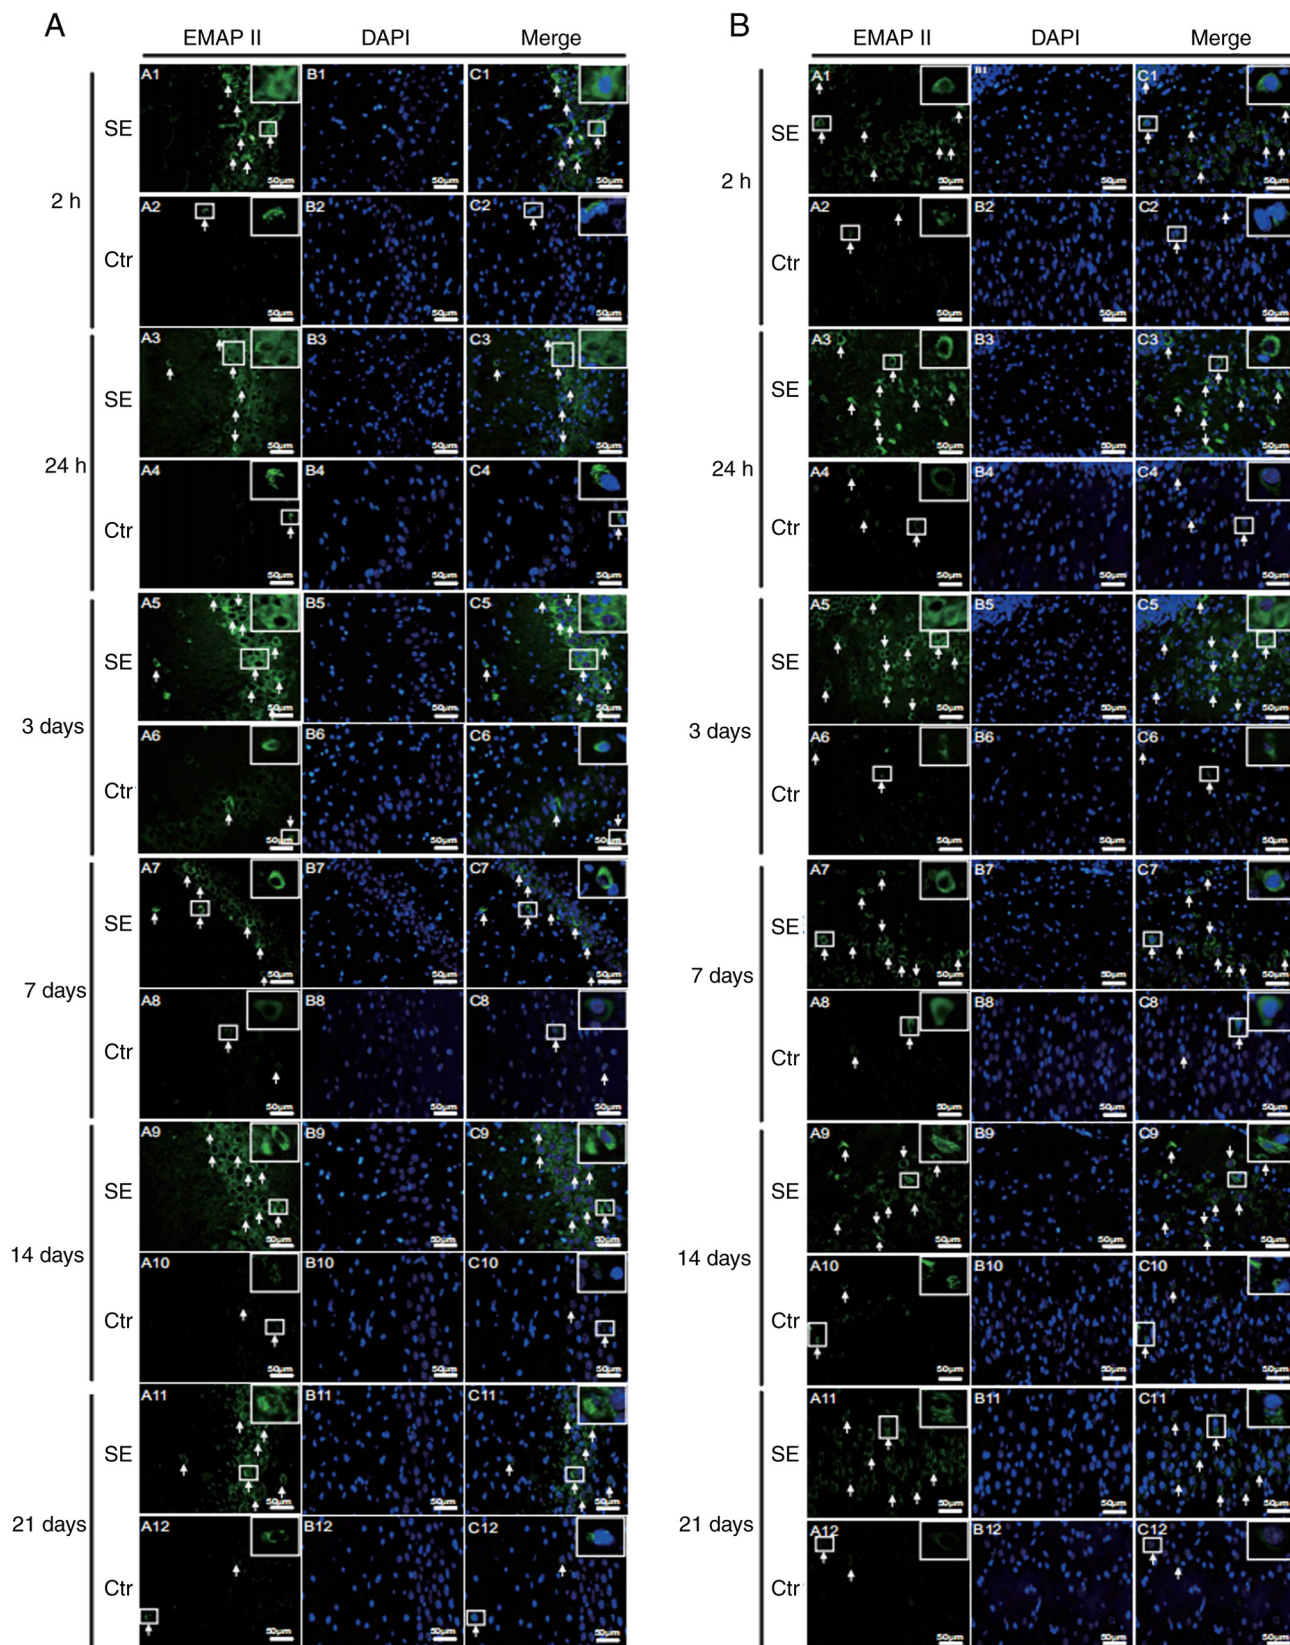

Supplement: Supplementary file 1 [file downloadSupplementary]
